# Supplementary material for: Health Monitoring of Pressure Regulating Stations in Gas Distribution Networks Using Mathematical Models
Source: MDPI journal article supplement (doi:10.3390/en15176264), 2022-08-28
Supplement: s1 [file s1]

## **Supplementary Information**

### **Health Monitoring of Pressure Regulating Stations in a Gas Distribution Network using Digital Twins**

**Shivom Sharma <sup>1</sup>, Iftekhar A. Karimi <sup>1,\*</sup>, Shamsuzzaman Farooq <sup>1,\*</sup>,  
Lakshminarayanan Samavedham <sup>1</sup> and Rajagopalan Srinivasan <sup>2</sup>**

<sup>1</sup> Department of Chemical & Biomolecular Engineering, National University of  
Singapore, Singapore 117585, Singapore

<sup>2</sup> Department of Chemical Engineering, Indian Institute of Technology Madras, Chennai  
600036, India

\* Correspondence: cheiak@nus.edu.sg (I.A.K.); chesf@nus.edu.sg (S.F.)

**Table S1:** Vendor data (inlet and outlet pressures, and flow) for all pressure regulators. The capacities shown in the tables are given in terms of natural gas specific gravity (SG = 0.6).

For all other gases, multiply flow by the correction factor ( $= 0.6/\text{SG of gas}$ )<sup>0.5</sup>.

| P <sub>in</sub> ,<br>mbarg | P <sub>out</sub> ,<br>mbarg | Q, m <sup>3</sup> /h |      |      | P <sub>in</sub> ,<br>mbarg | P <sub>out</sub> ,<br>mbarg | Q, m <sup>3</sup> /h<br>2"-S |
|----------------------------|-----------------------------|----------------------|------|------|----------------------------|-----------------------------|------------------------------|
|                            |                             | 4"                   | 3"   | 2"   |                            |                             |                              |
| 750                        | 15                          | 5900                 | 3100 | 1654 | 1000                       | 17                          | 500                          |
| 500                        | 15                          | 4600                 | 2450 | 1221 | 700                        | 17                          | 340                          |
| 250                        | 15                          | 3000                 | 1250 | 831  | 350                        | 17                          | 225                          |
| 200                        | 15                          | 2875                 | 980  | 703  | 140                        | 17                          | 140                          |
| 150                        | 15                          | 2125                 | 805  | 550  | 70                         | 17                          | 90                           |
| 100                        | 15                          | 1400                 | 605  | 462  |                            |                             |                              |
| 75                         | 15                          | 1250                 | 550  | 300  |                            |                             |                              |
| 50                         | 15                          | 1160                 | 485  | 220  |                            |                             |                              |

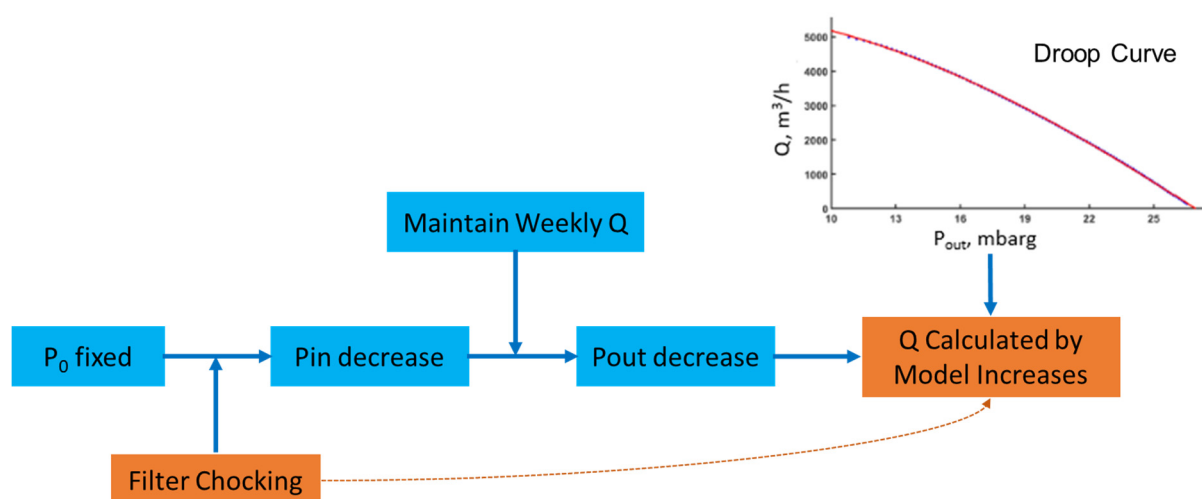

**Figure S1:** Impact of filter choking on the flow calculated by the mathematical model.

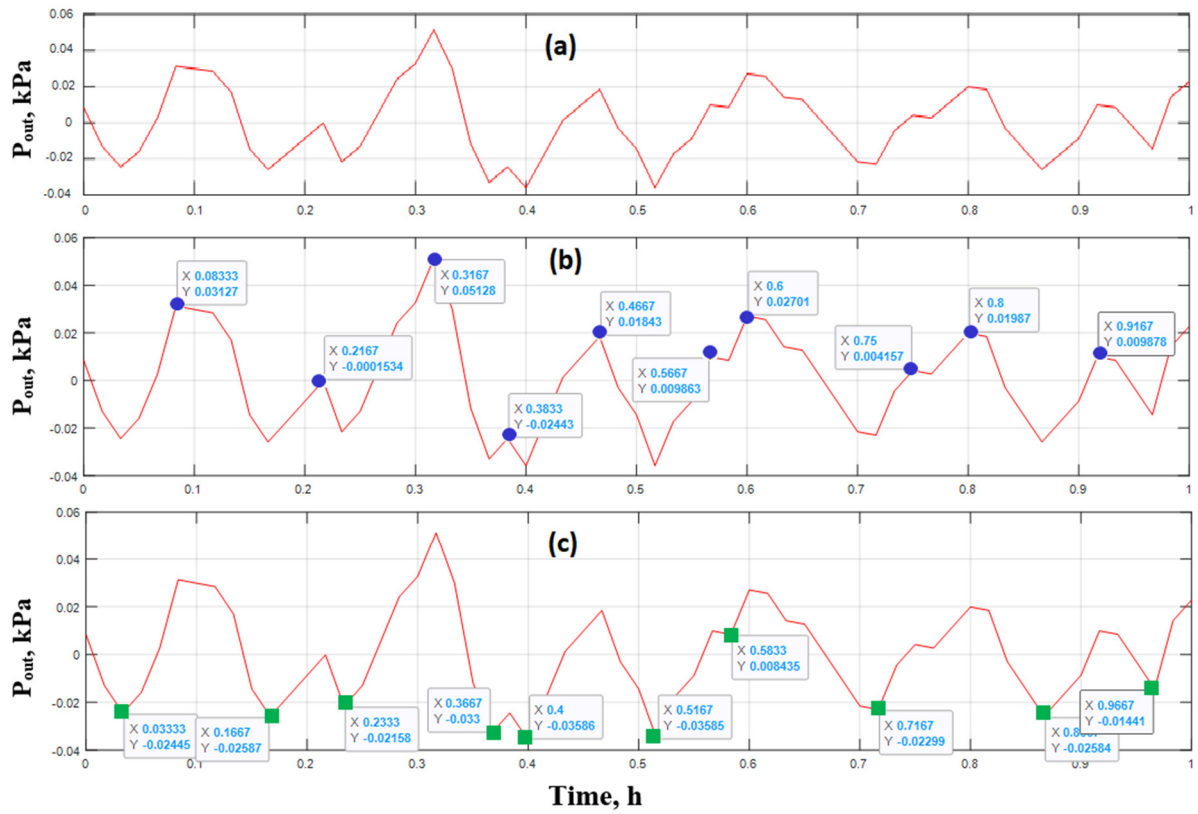

Figure S2: (a) detrend  $P_{out}$ , (b) local maximum ●, (c) local minimum ■

PR Group Analysis

PR Performance Comparison

Working Directroy

Desktop\PRHM

Choose Other

Add New Data

Yes

No

Arrange/Edit

Rearrange Group

Edit Group

Select

Save

Analyse Group

PR Group 2

Analyse

Plots Display

Select

Close

| PR Name | PR Type | Analyse (Y/N) | Pout-SP (kPa) | Start Date MM/DD/YYYY | End Date MM/DD/YYYY | Main Date MM/DD/YYYY | Excel Data File Location                       | Excel Data File Name | Open Excel                          |
|---------|---------|---------------|---------------|-----------------------|---------------------|----------------------|------------------------------------------------|----------------------|-------------------------------------|
| RG2_1   | 2"D     | ✓             | 1.8000        | 2/1/2020              | 05/22/2020          | 2/1/2020             | C:\Users\cheshivo\Desktop\PRHM\Data\PR Group 2 | Data_RG2_1           | <input checked="" type="checkbox"/> |
| RG2_2   | 4"D     | ✓             | 1.8000        | 2/1/2020              | 4/11/2020           | 2/1/2020             | C:\Users\cheshivo\Desktop\PRHM\Data\PR Group 2 | Data_RG2_2           | <input checked="" type="checkbox"/> |
| RG2_3   | 4"D     | ✓             | 1.8000        | 2/1/2020              | 05/22/2020          | 2/1/2020             | C:\Users\cheshivo\Desktop\PRHM\Data\PR Group 2 | Data_RG2_3           | <input checked="" type="checkbox"/> |
| RG2_4   | 4"D     |               | 1.8000        | 2/1/2020              | 05/22/2020          | 2/1/2020             | C:\Users\cheshivo\Desktop\PRHM\Data\PR Group 2 | Data_RG2_4           | <input type="checkbox"/>            |
| RG2_5   | 4"D     | ✓             | 1.8000        | 2/1/2020              | 05/22/2020          | 2/1/2020             | C:\Users\cheshivo\Desktop\PRHM\Data\PR Group 2 | Data_RG2_5           | <input checked="" type="checkbox"/> |
| RG2_6   | 4"D     | ✓             | 1.8000        | 2/1/2020              | 05/22/2020          | 2/1/2020             | C:\Users\cheshivo\Desktop\PRHM\Data\PR Group 2 | Data_RG2_6           | <input checked="" type="checkbox"/> |
| RG2_7   | 2"D     | ✓             | 1.8000        | 2/1/2020              | 05/22/2020          | 2/1/2020             | C:\Users\cheshivo\Desktop\PRHM\Data\PR Group 2 | Data_RG2_7           | <input checked="" type="checkbox"/> |
| RG2_8   | 4"D     | ✓             | 1.8000        | 2/1/2020              | 05/22/2020          | 2/1/2020             | C:\Users\cheshivo\Desktop\PRHM\Data\PR Group 2 | Data_RG2_8           | <input checked="" type="checkbox"/> |
| RG2_9   | 4"D     | ✓             | 1.8000        | 2/1/2020              | 05/22/2020          | 2/1/2020             | C:\Users\cheshivo\Desktop\PRHM\Data\PR Group 2 | Data_RG2_9           | <input checked="" type="checkbox"/> |
| RG2_10  | 2"D     | ✓             | 1.8000        | 2/1/2020              | 5/8/2020            | 2/1/2020             | C:\Users\cheshivo\Desktop\PRHM\Data\PR Group 2 | Data_RG2_10          | <input checked="" type="checkbox"/> |
| RG2_11  | 2"D     |               | 1.8000        | 2/1/2020              | 05/22/2020          | 2/1/2020             | C:\Users\cheshivo\Desktop\PRHM\Data\PR Group 2 | Data_RG2_11          | <input type="checkbox"/>            |
| RG2_12  | 2"D     |               | 1.8000        | 2/1/2020              | 05/22/2020          | 2/1/2020             | C:\Users\cheshivo\Desktop\PRHM\Data\PR Group 2 | Data_RG2_12          | <input type="checkbox"/>            |
| RG2_13  | 2"D     | ✓             | 1.8000        | 2/1/2020              | 05/22/2020          | 2/1/2020             | C:\Users\cheshivo\Desktop\PRHM\Data\PR Group 2 | Data_RG2_13          | <input checked="" type="checkbox"/> |
| RG2_14  | 4"J     |               | 1.8000        | 2/1/2020              | 05/22/2020          | 2/1/2020             | C:\Users\cheshivo\Desktop\PRHM\Data\PR Group 2 | Data_RG2_14          | <input type="checkbox"/>            |
| RG2_15  | 4"D     |               | 1.8000        | 2/1/2020              | 05/22/2020          | 2/1/2020             | C:\Users\cheshivo\Desktop\PRHM\Data\PR Group 2 | Data_RG2_15          | <input type="checkbox"/>            |

Figure S3: Input data table to analyze a group (e.g., regulator group 2) of pressure regulators.

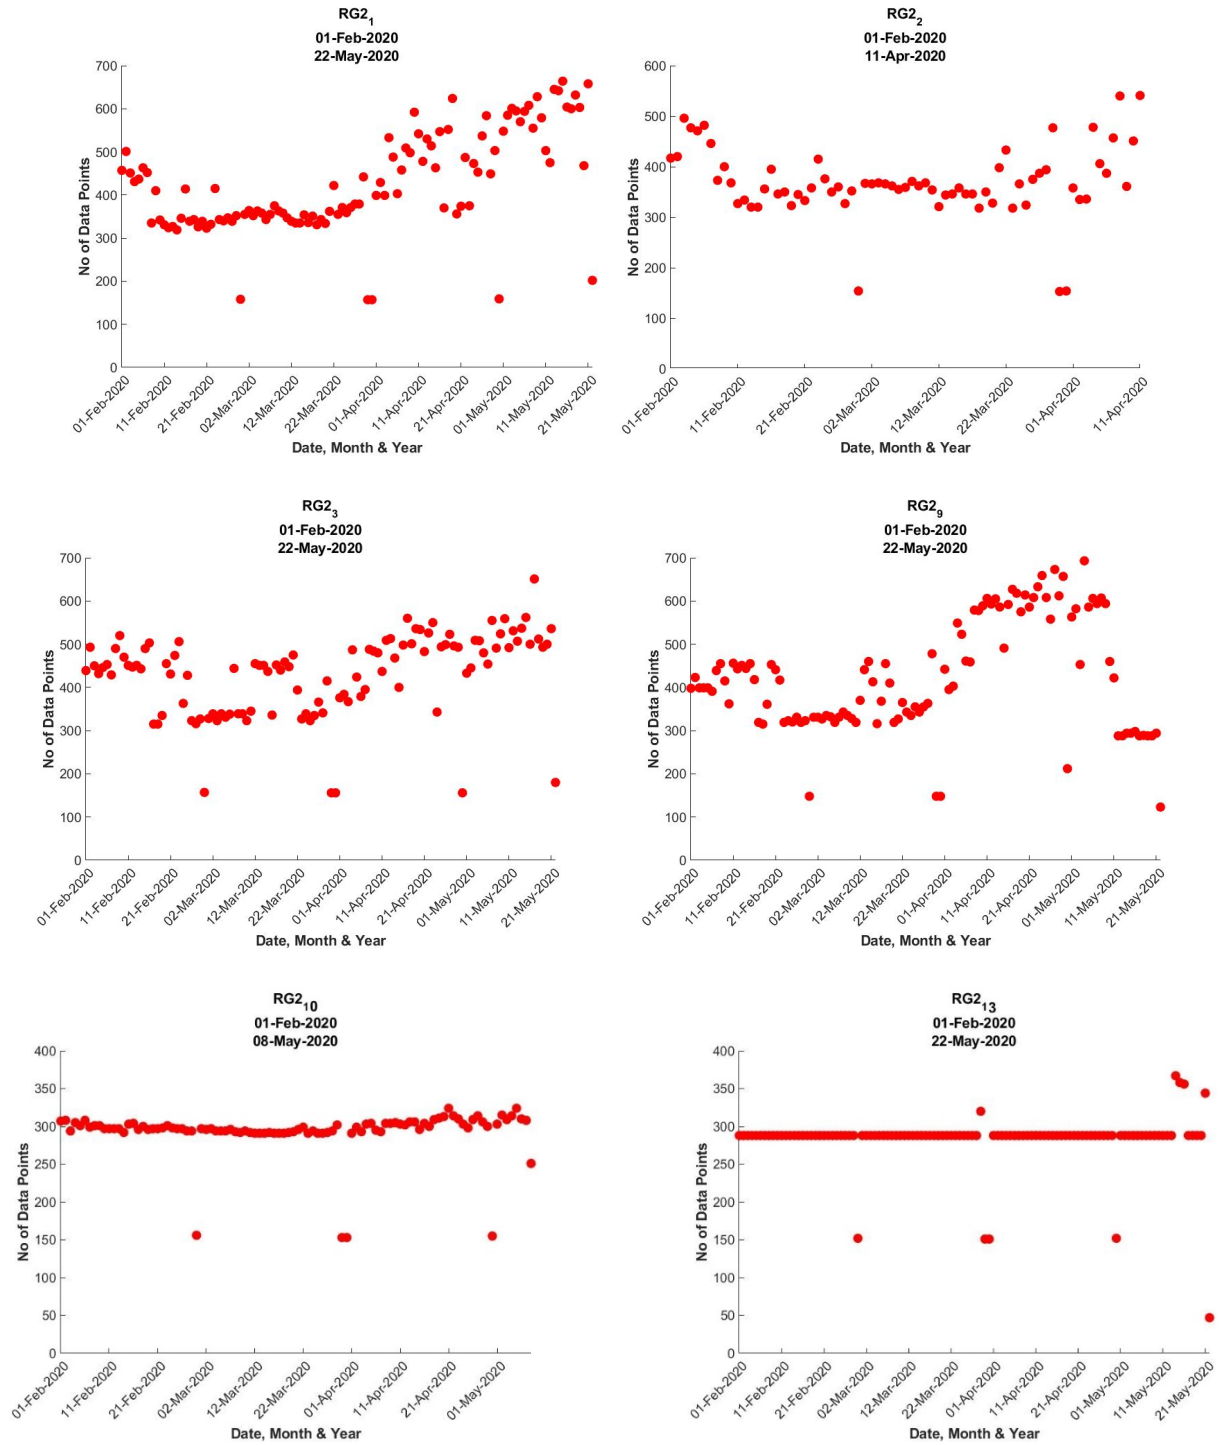

**Figure S4:** Daily number of data samples for RG2\_1, RG2\_2, RG2\_3, RG2\_9, RG2\_10 and RG2\_13 pressure regulators.

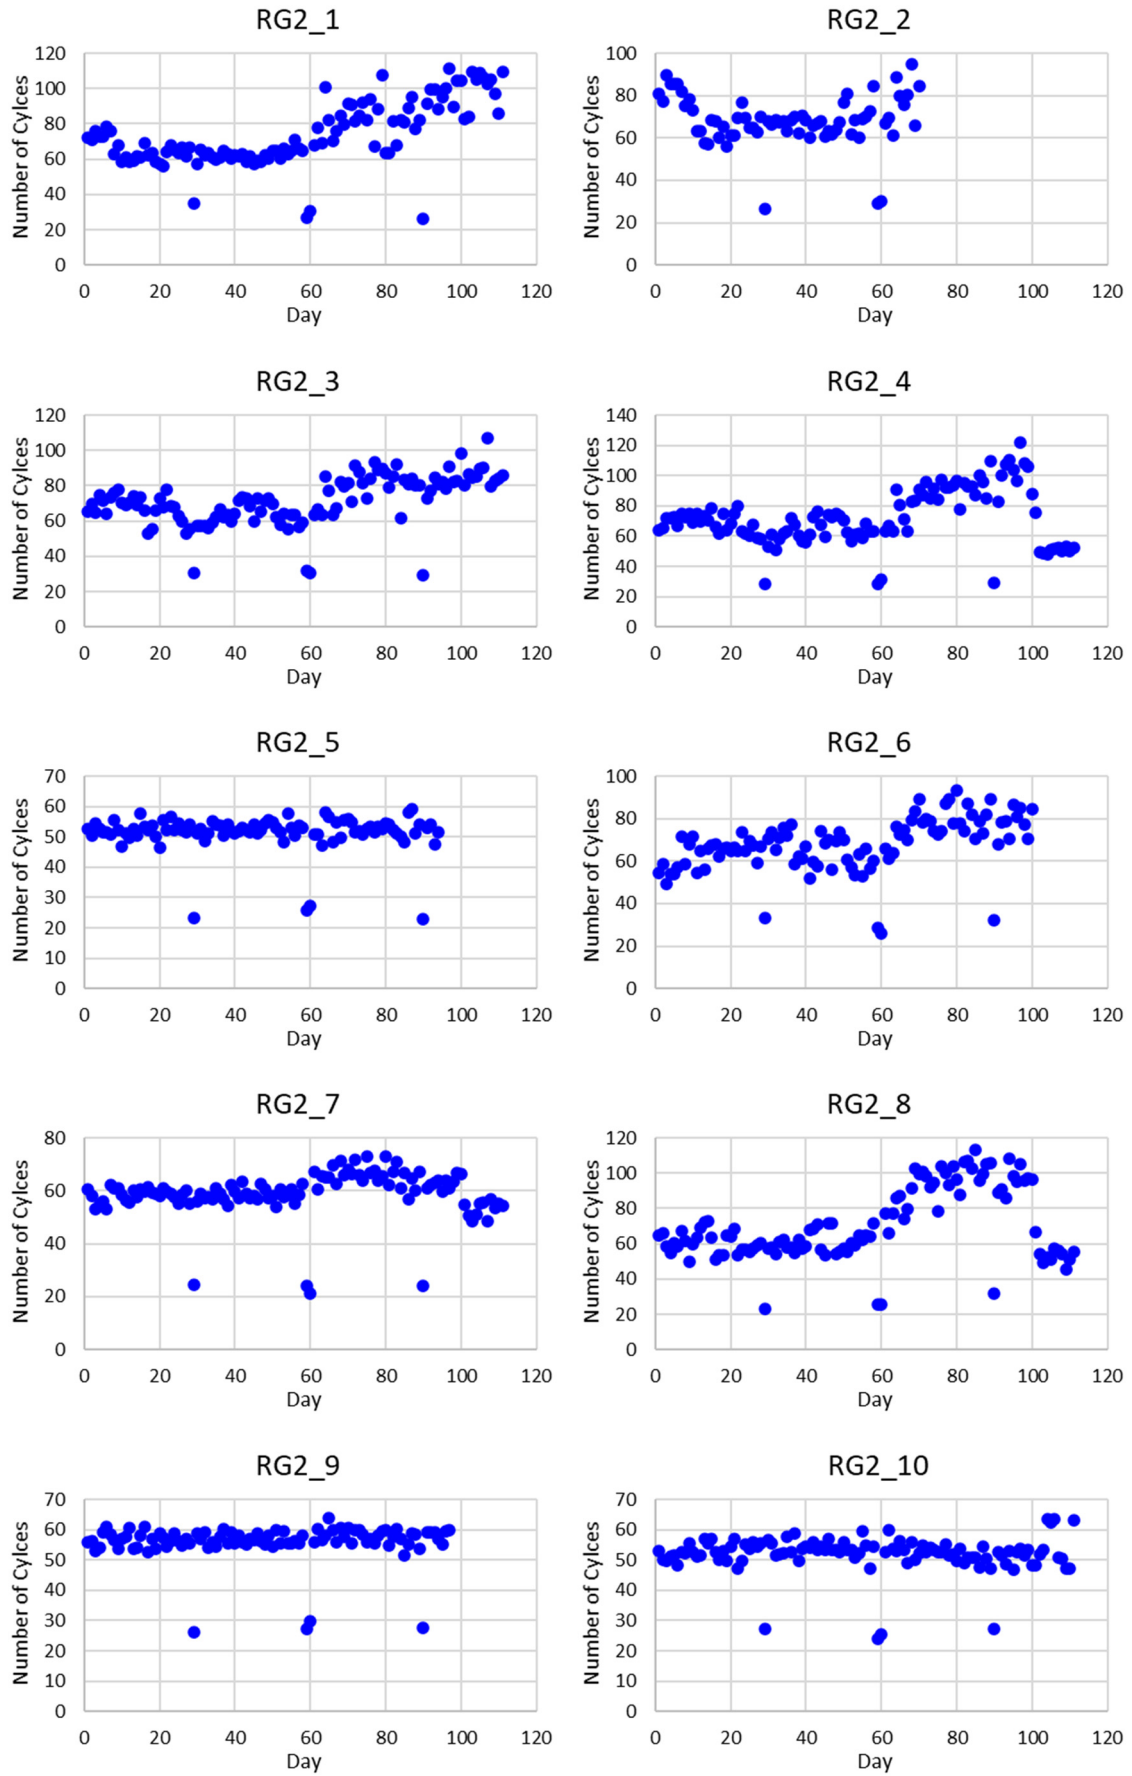

**Figure S5:** Daily number of diaphragm cycles for different pressure regulators.

**Table S2:** Confidence intervals of estimated coefficients (intercept and slope) of linear regression model for filter (RUL). The confidence intervals were calculated for fitted line with positive slope.

| PR<br>name | Parameters of linear regression model for filter RUL |                                       |        |       |                                   |       | RUL & 95%<br>confidence<br>range, w |
|------------|------------------------------------------------------|---------------------------------------|--------|-------|-----------------------------------|-------|-------------------------------------|
|            | Intercept                                            | Intercept confidence<br>interval: 95% |        | Slope | Slope confidence<br>interval: 95% |       |                                     |
|            |                                                      | Lower                                 | Upper  |       | Lower                             | Upper |                                     |
| RG2_1      | 129579                                               | 128425                                | 130733 | 341   | 221                               | 460   | 70.2 & 45-122                       |
| RG2_3      | 442483                                               | 438992                                | 445973 | 1344  | 983                               | 1705  | 57 & 39-87                          |
| RG2_5      | 476043                                               | 472041                                | 480045 | 1393  | 979                               | 1807  | 59 & 40-95                          |
| RG2_7      | 133117                                               | 132441                                | 133792 | 424   | 354                               | 494   | 48.1 & 38-63                        |
| RG2_8      | 438118                                               | 434934                                | 441303 | 1572  | 1243                              | 1901  | 46.4 & 34-65                        |
| RG2_9      | 524466                                               | 520079                                | 528853 | 1358  | 904                               | 1811  | 70.2 & 46-118                       |
| RG2_10     | 94904                                                | 92781                                 | 97028  | 295   | 45                                | 544   | 71.5 & 26-591                       |
| RG2_13     | 129783                                               | 129039                                | 130527 | 402   | 325                               | 479   | 54.1 & 41-73                        |

**Table S3:** Confidence intervals of estimated coefficients (intercept and slope) of linear regression model for valve seat (RUL). The confidence intervals were calculated for fitted line with positive slope.

| PR name | Parameters of linear regression model for valve seat RUL |                                    |       |          |                                |          | RUL & 95% confidence range, d |
|---------|----------------------------------------------------------|------------------------------------|-------|----------|--------------------------------|----------|-------------------------------|
|         | Intercept                                                | Intercept confidence interval: 95% |       | Slope    | Slope confidence interval: 95% |          |                               |
|         |                                                          | Lower                              | Upper |          | Lower                          | Upper    |                               |
| RG2_7   | 1.88                                                     | 1.87                               | 1.89  | 0.000252 | 0.000164                       | 0.000340 | 2344 & 1684-3731              |
| RG2_8   | 2.05                                                     | 2.04                               | 2.06  | 0.000624 | 0.000451                       | 0.000796 | 612 & 443-910                 |
| RG2_9   | 1.90                                                     | 1.90                               | 1.91  | 0.000129 | 0.000027                       | 0.000230 | 4536 & 2455-22112             |
| RG2_10  | 1.91                                                     | 1.90                               | 1.91  | 0.000068 | -0.000020                      | 0.000155 | 8638                          |
